# Supplementary material for: Pediatric Oral Cavity Physiologically Based Pharmacokinetic Model to Predict Pharmacokinetics of Mucoadhesive Atropine Gel to Treat Sialorrhea
Source: Research Square preprint supplement (doi:10.21203/rs.3.rs-8780503/v1), 2026-02-19
Supplement: Supplementary file 1 [file dcd855628ae83fae6014cb1a.docx]

**Supplementary materials**

**Supplementary Table S*1*** Hyperbolic functions of the fraction of CYP abundance [57].

| **Enzyme** | **Hyperbolic function** |
| --- | --- |
| CYP3A |  |
| CYP2D6 |  |
| CYP2D18/19 |  |
